# Supplementary material for: Gene-based association study of rare variants in children of diverse ancestries implicates TNFRSF21 in the development of allergic asthma
Source: PubMed Central journal article supplement — J Allergy Clin Immunol. Author manuscript; Available in PMC 2024 Mar 14. (PMC10939893; doi:10.1016/j.jaci.2023.10.023), 2023-11-07
Supplement: NIHMS1953665-supplement-4.pdf [file NIHMS1953665-supplement-4.pdf]

|                         | Allergen Sensitization |           | Eosinophil Count |       | Neutrophil Cont | FEV1 % Predicted | FEV1/FVC Z score | Bronchodilator Response |        |
|-------------------------|------------------------|-----------|------------------|-------|-----------------|------------------|------------------|-------------------------|--------|
|                         | Allergen Sensitization | Total IgE | Eosinophil Count | FeNO  | Neutrophil Cont | FEV1 % Predicted | FEV1/FVC Z score | Bronchodilator Response | r      |
| Allergen Sensitization  | 1.00                   | 0.82      | 0.49             | 0.48  | 0.03            | -0.14            | -0.21            | 0.29                    | 1.00   |
| Total IgE               | 0.82                   | 1.00      | 0.50             | 0.46  | 0.08            | -0.14            | -0.22            | 0.27                    | 0.50   |
| Eosinophil Count        | 0.49                   | 0.50      | 1.00             | 0.44  | 0.09            | -0.13            | -0.17            | 0.25                    | 0.00   |
| FeNO                    | 0.48                   | 0.46      | 0.44             | 1.00  | 0.04            | -0.07            | -0.15            | 0.24                    | -0.50  |
| Neutrophil Cont         | 0.03                   | 0.08      | 0.09             | 0.04  | 1.00            | -0.03            | -0.03            | 0.05                    | -1.00  |
| FEV1 % Predicted        | -0.14                  | -0.14     | -0.13            | -0.07 | -0.03           | 1.00             | 0.47             | -0.45                   | p>0.05 |
| FEV1/FVC Z score        | -0.21                  | -0.22     | -0.17            | -0.15 | -0.03           | 0.47             | 1.00             | -0.55                   |        |
| Bronchodilator Response | 0.29                   | 0.27      | 0.25             | 0.24  | 0.05            | -0.45            | -0.55            | 1.00                    |        |
