# Supplementary material for: Gene-based association study of rare variants in children of diverse ancestries implicates TNFRSF21 in the development of allergic asthma
Source: PubMed Central journal article supplement — J Allergy Clin Immunol. Author manuscript; Available in PMC 2024 Mar 14. (PMC10939893; doi:10.1016/j.jaci.2023.10.023), 2023-11-07
Supplement: NIHMS1953665-supplement-6.pdf [file NIHMS1953665-supplement-6.pdf]

**A**

## Allergen Sensitization

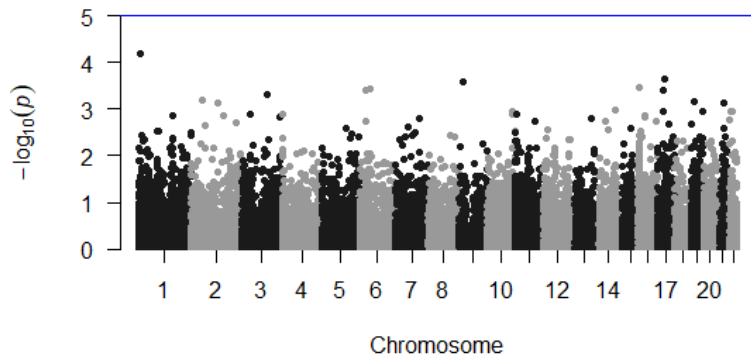**B**

## VAMP3 Variant Set Marginal Associations with Allergen Sensitization

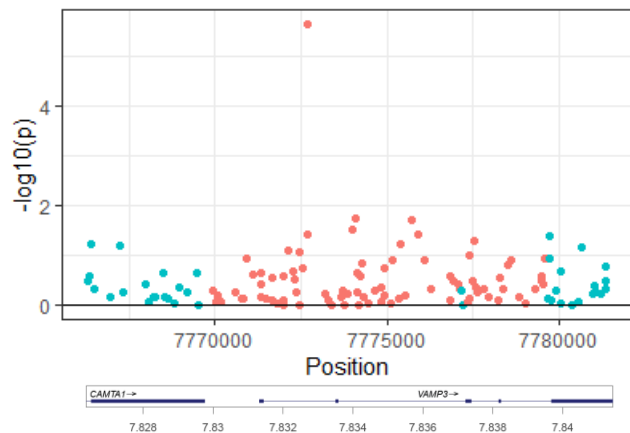**C**

| Trait                        | <i>P</i> -Value       |
|------------------------------|-----------------------|
| Allergen sensitization       | $6.42 \times 10^{-5}$ |
| Total IgE                    | $8.85 \times 10^{-3}$ |
| Blood Eosinophil Count       | 0.19                  |
| Blood Neutrophil Count       | 0.24                  |
| FeNO                         | 0.25                  |
| FEV <sub>1</sub> % predicted | $1.71 \times 10^{-2}$ |
| FEV <sub>1</sub> /FVC        | 0.12                  |
| Bronchodilator Response      | 0.81                  |

- Non-coding
- Coding
