# Supplementary material for: Gene-based association study of rare variants in children of diverse ancestries implicates TNFRSF21 in the development of allergic asthma
Source: PubMed Central journal article supplement — J Allergy Clin Immunol. Author manuscript; Available in PMC 2024 Mar 14. (PMC10939893; doi:10.1016/j.jaci.2023.10.023), 2023-11-07

APIC - USF1 score

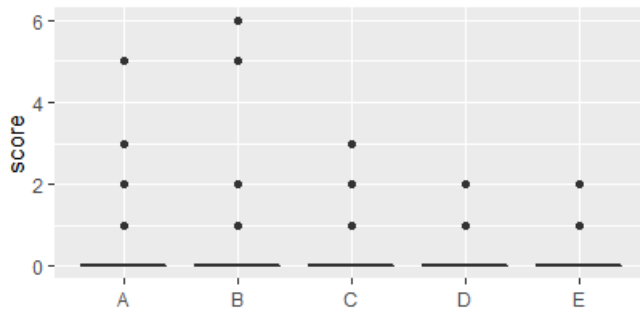

APIC - PIK3R6 score

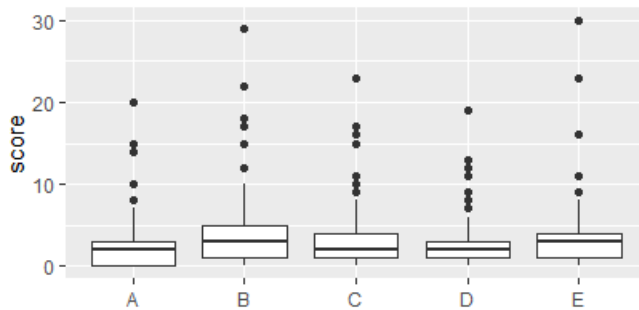

APIC - TNFRSF21 score

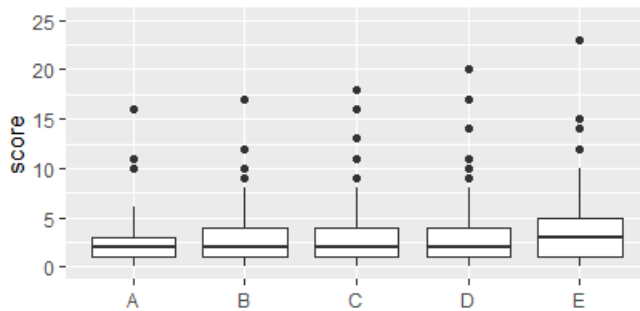

APIC - 3 gene score

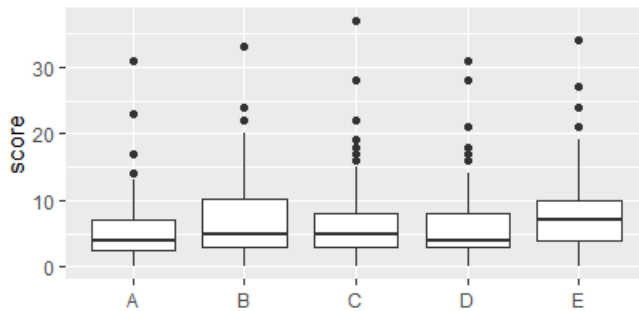

URECA - USF1 score

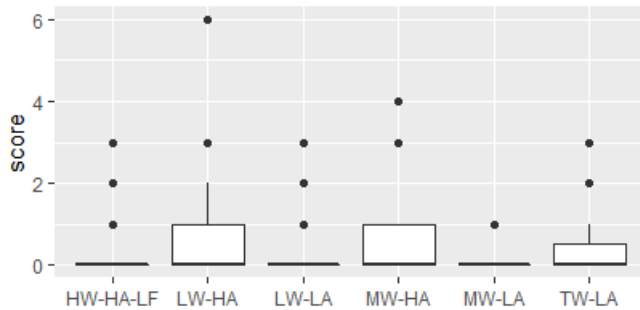

URECA - PIK3R6 score

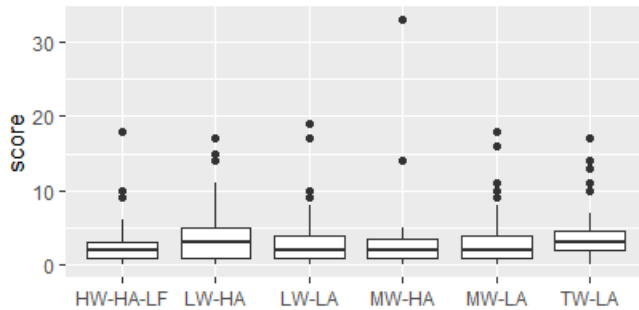

URECA - TNFRSF21 score

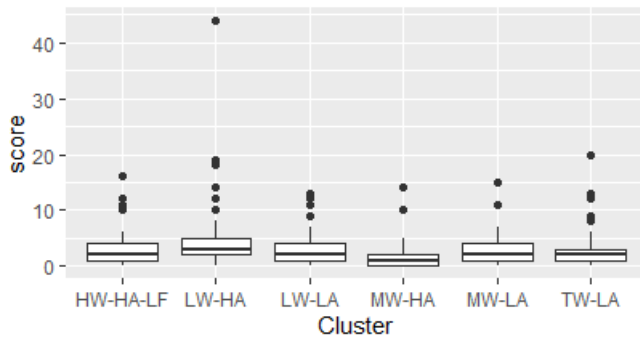

URECA - 3 gene score score

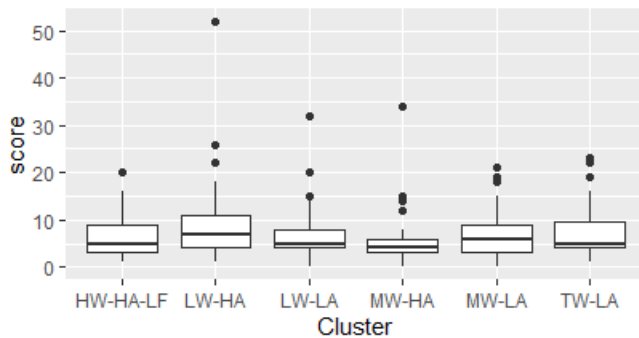

Supplement: NIHMS1953665-supplement-8.pdf [file NIHMS1953665-supplement-8.pdf]
