# Supplementary figures and images for: Gene-based association study of rare variants in children of diverse ancestries implicates TNFRSF21 in the development of allergic asthma
Source: PubMed Central journal article supplement — J Allergy Clin Immunol. Author manuscript; Available in PMC 2024 Mar 14. (PMC10939893; doi:10.1016/j.jaci.2023.10.023), 2023-11-07

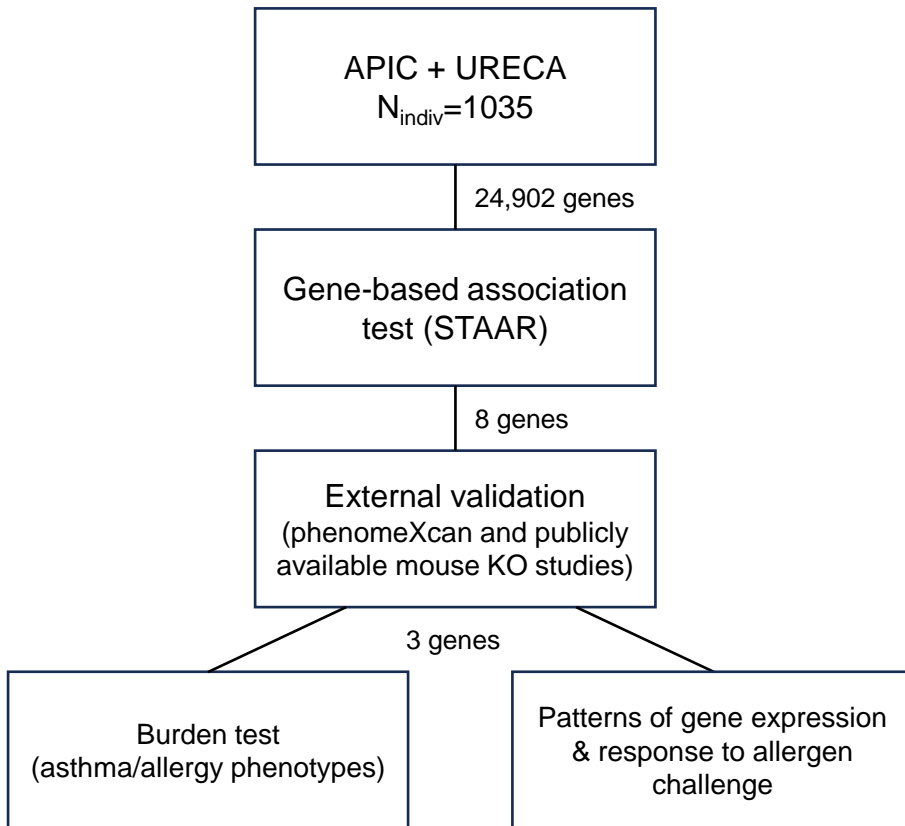

Supplement: NIHMS1953665-supplement-1.pdf [file NIHMS1953665-supplement-1.pdf]

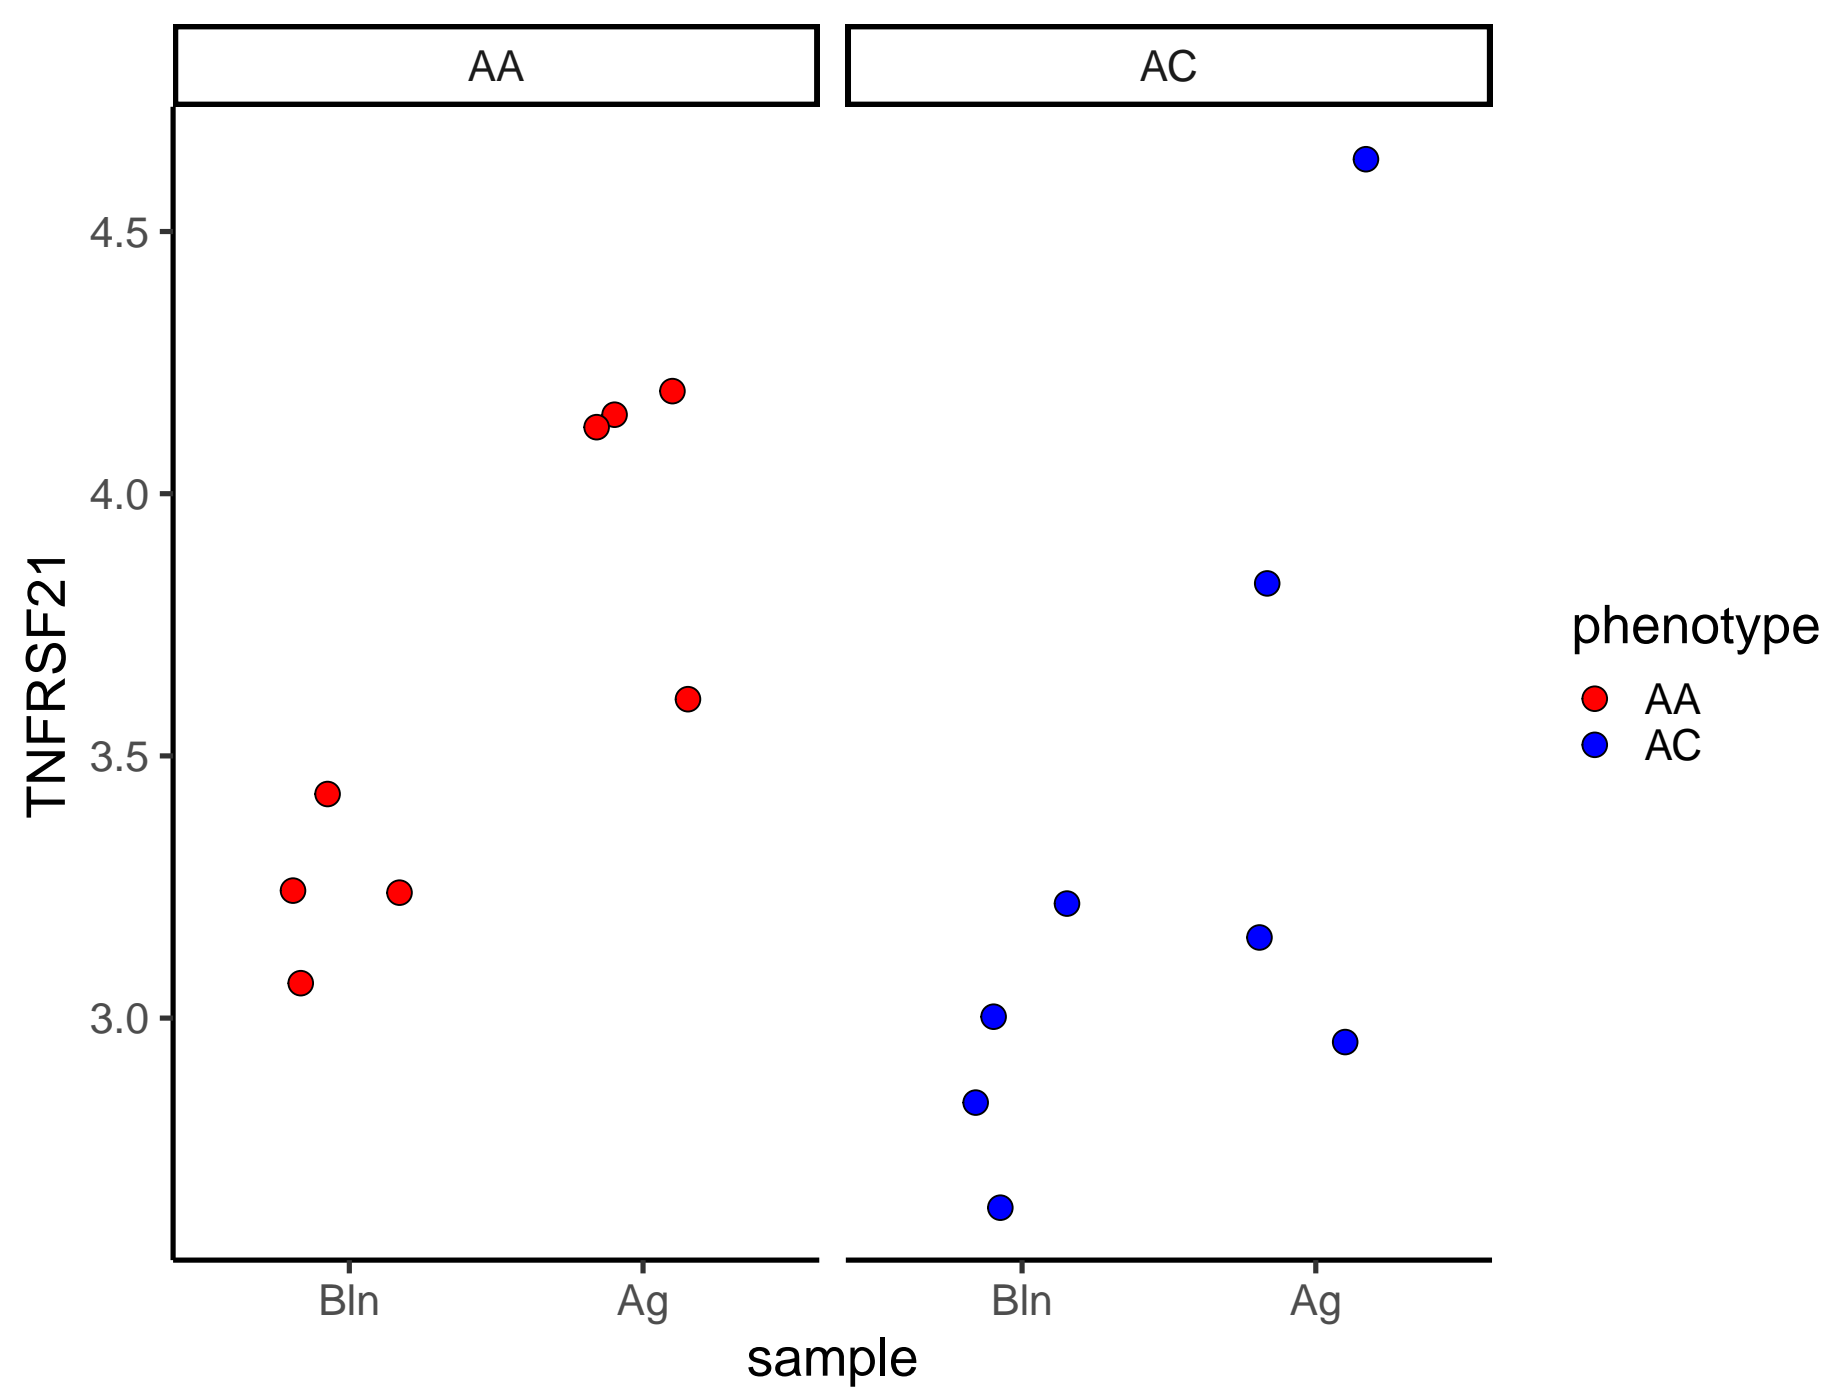

Supplement: NIHMS1953665-supplement-10.pdf [file NIHMS1953665-supplement-10.pdf]

# Histogram of Rare Variant MAF

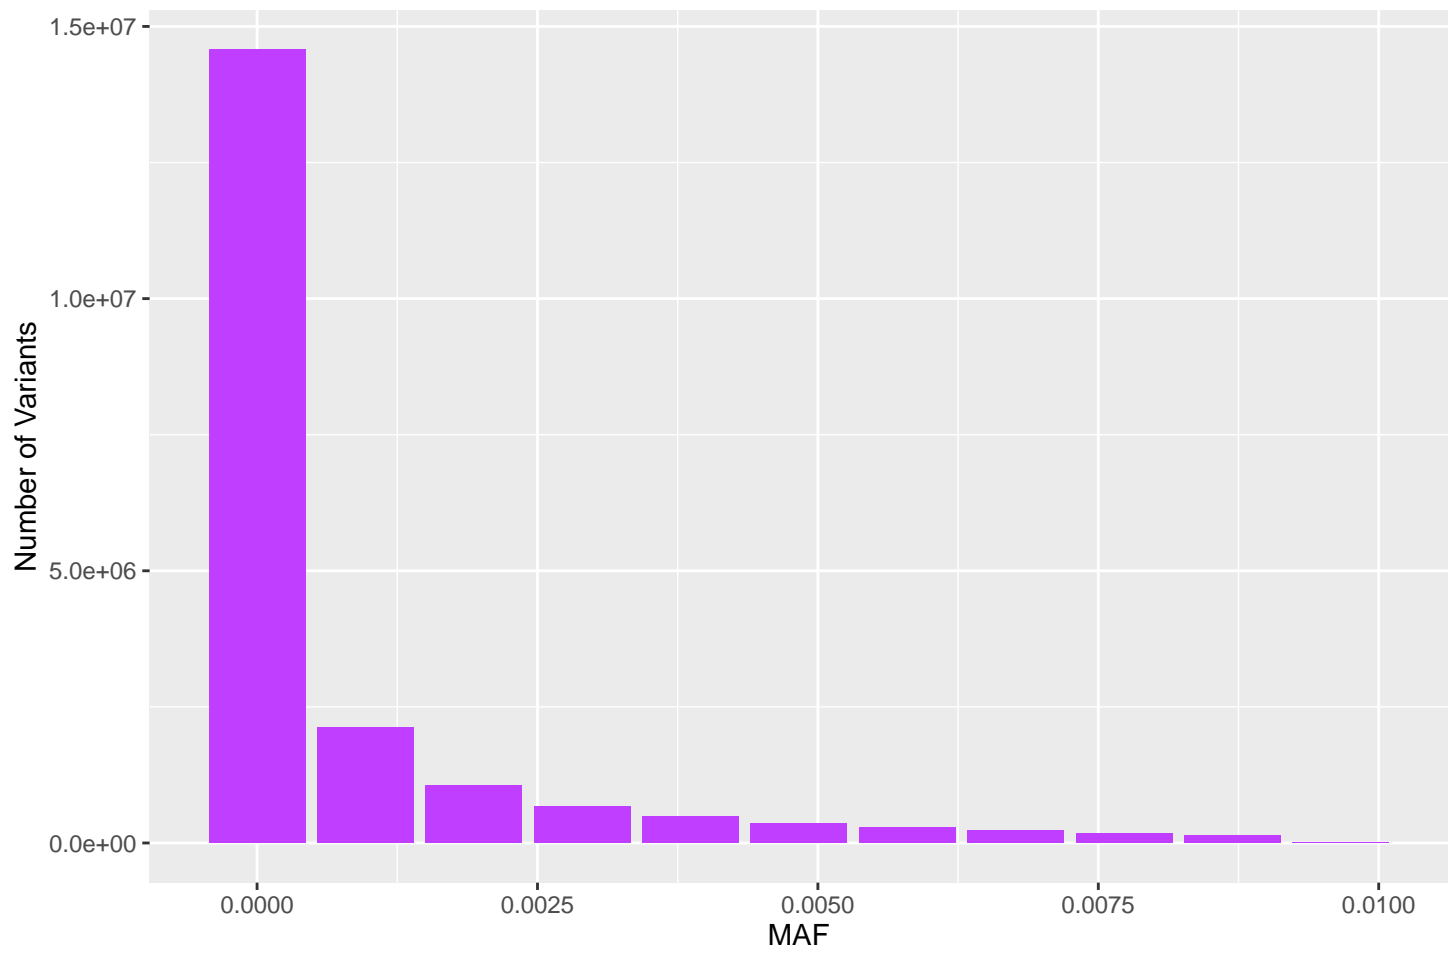

Supplement: NIHMS1953665-supplement-2.pdf [file NIHMS1953665-supplement-2.pdf]

# APIC & URECA PCA by Self-Identified Ancestry

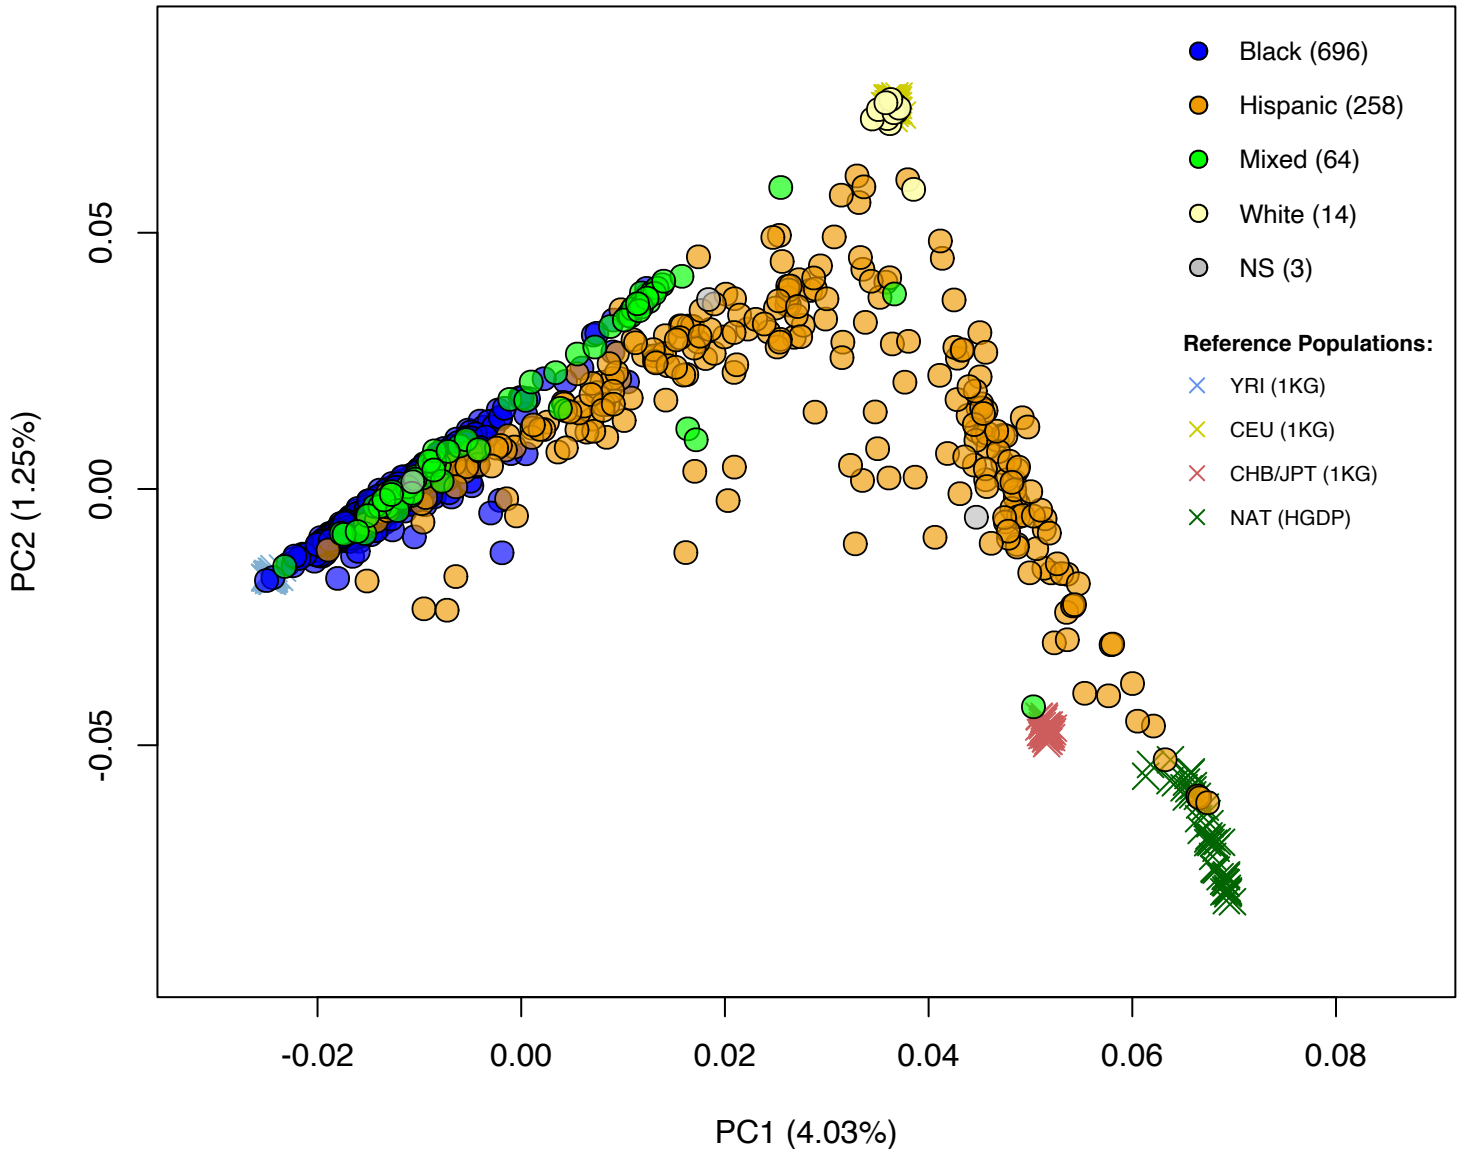

Supplement: NIHMS1953665-supplement-3.pdf [file NIHMS1953665-supplement-3.pdf]

**A**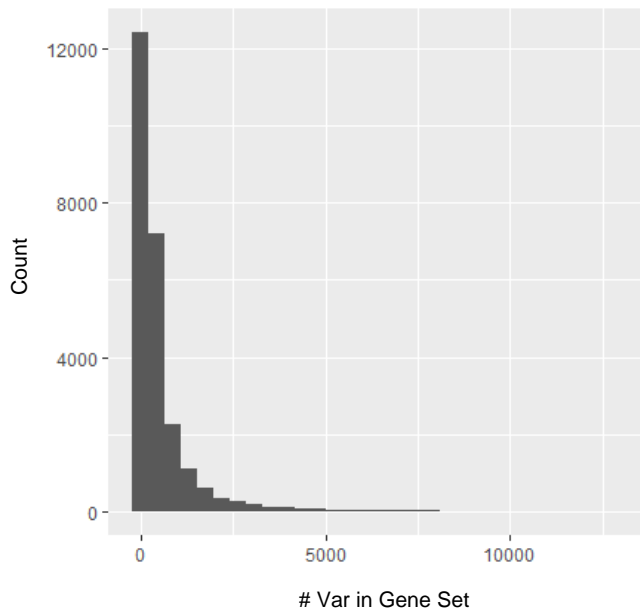**B**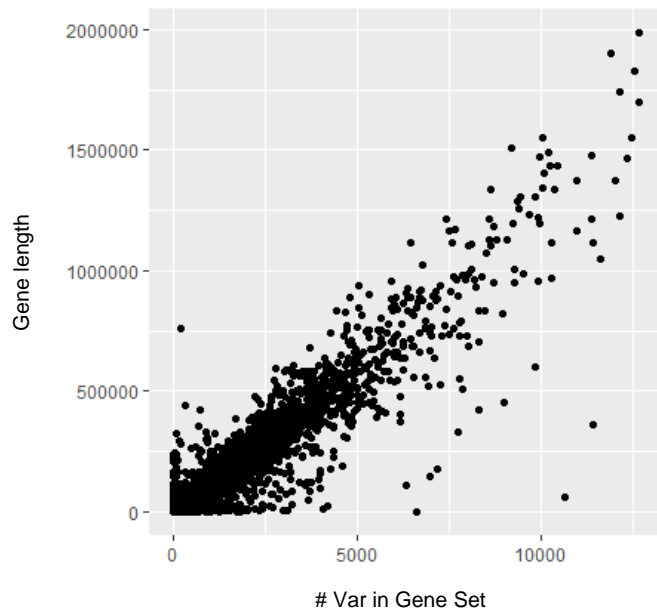

Supplement: NIHMS1953665-supplement-5.pdf [file NIHMS1953665-supplement-5.pdf]

**A** *USF1*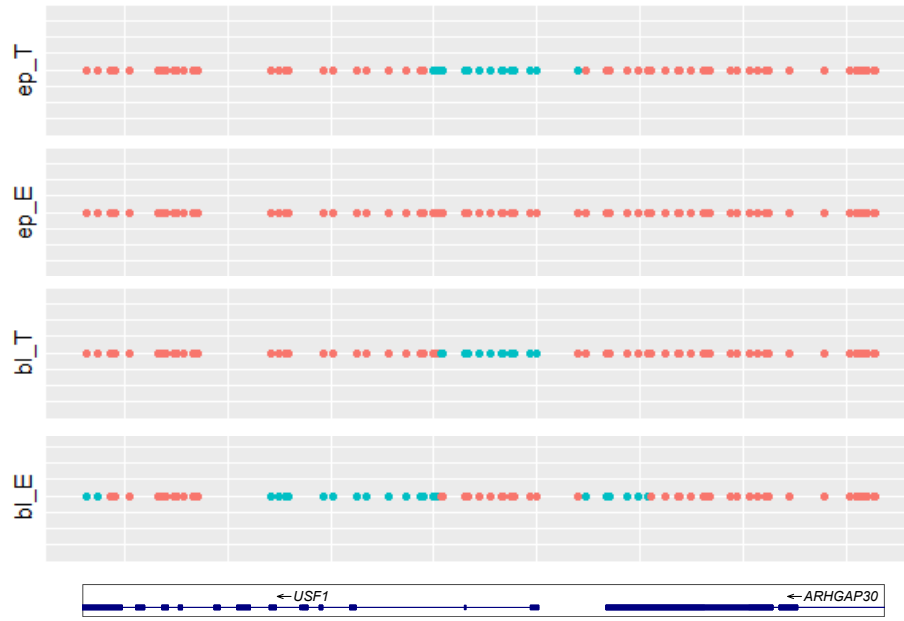**B** *TNFRSF21*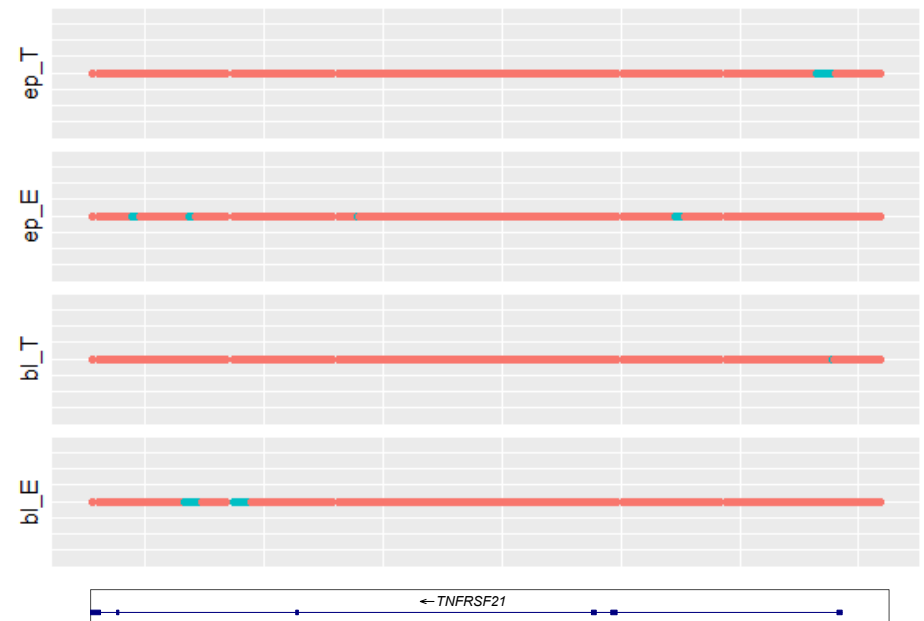**C** *PIK3R6*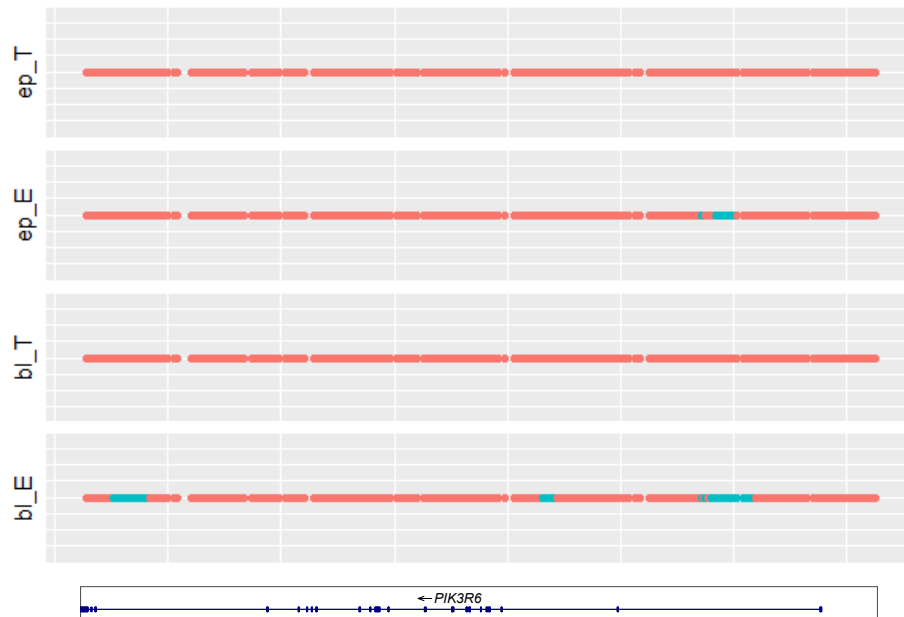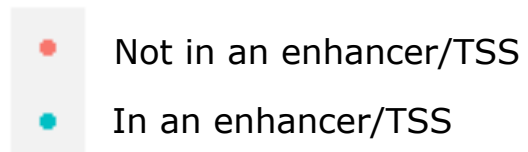

Supplement: NIHMS1953665-supplement-7.pdf [file NIHMS1953665-supplement-7.pdf]

**A**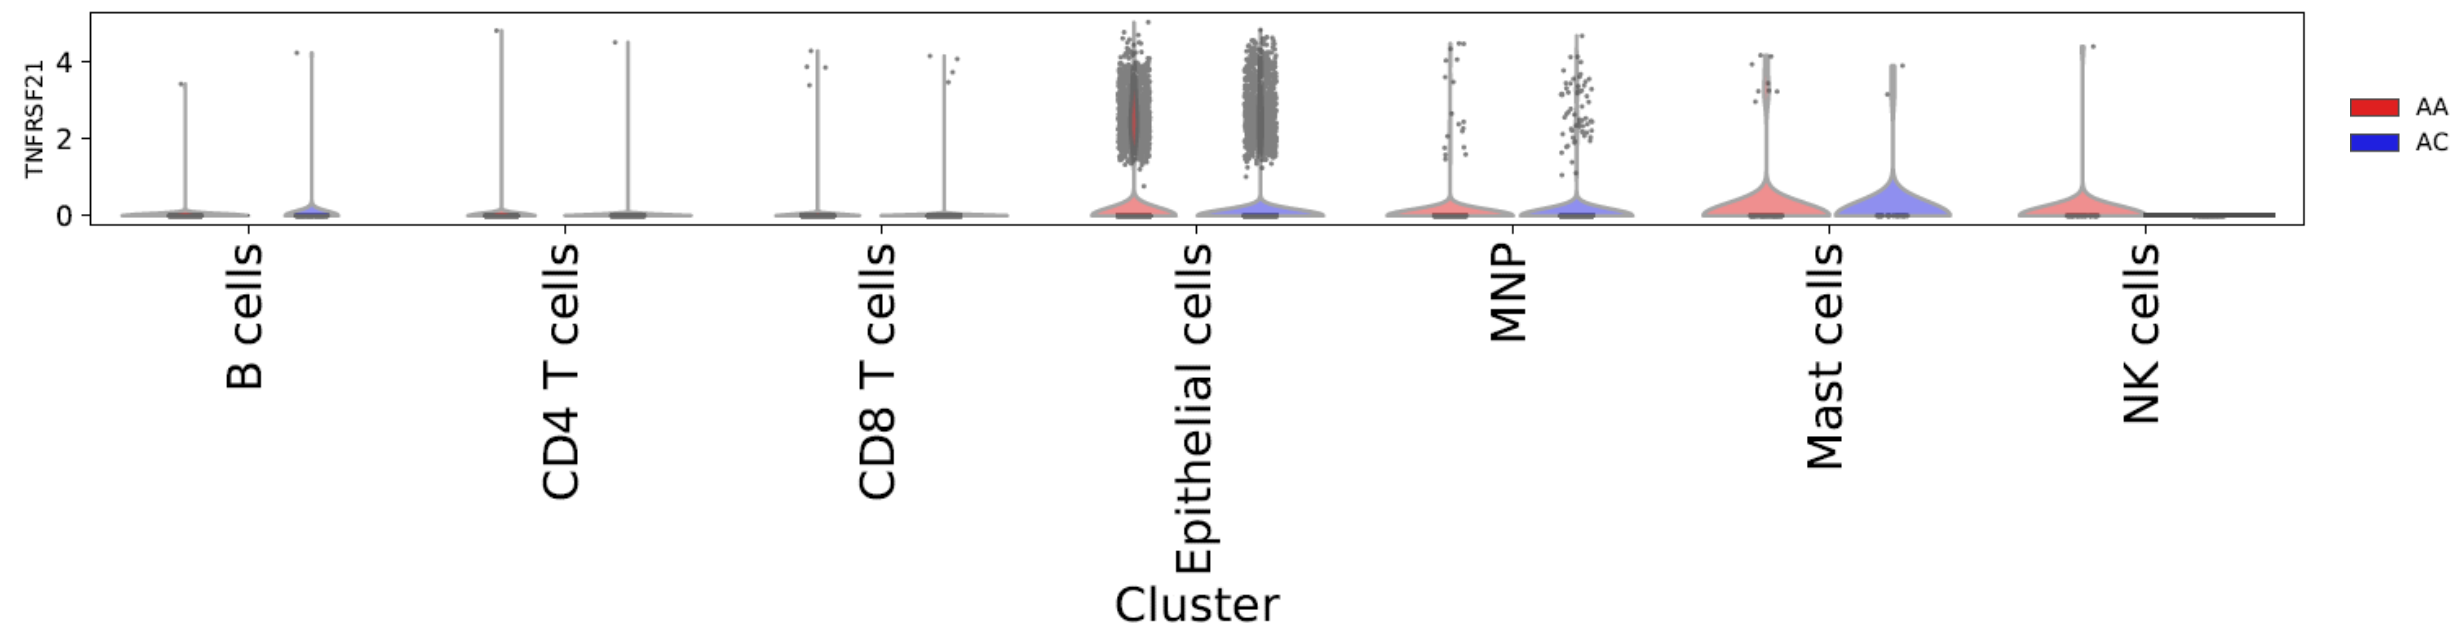**B**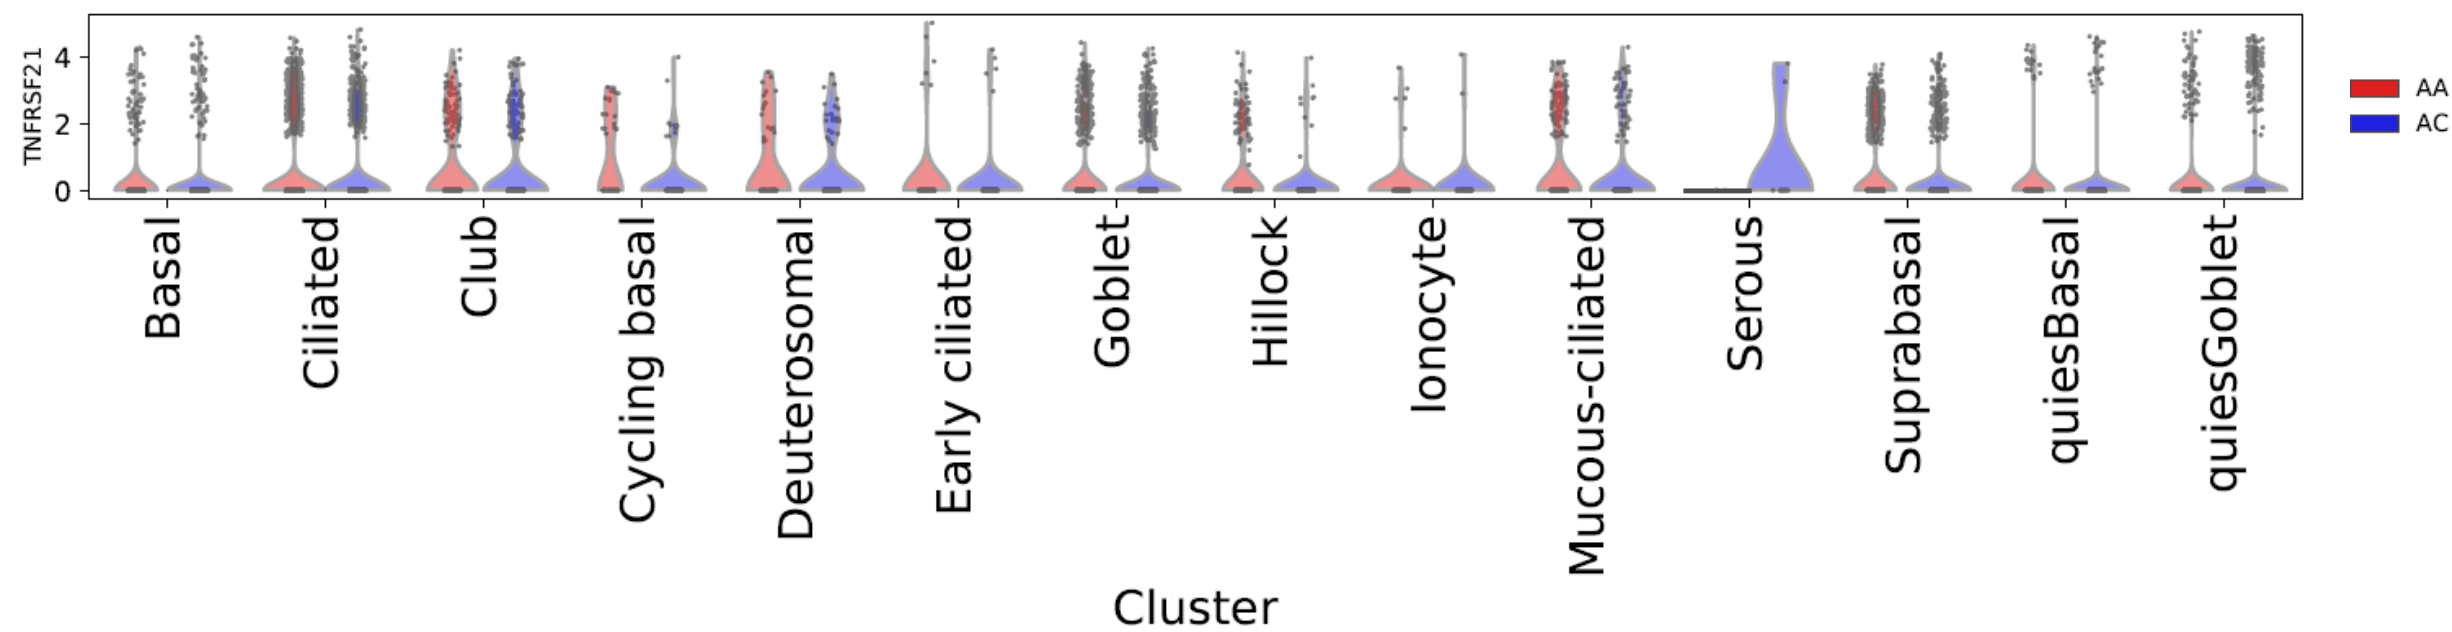

Supplement: NIHMS1953665-supplement-9.pdf [file NIHMS1953665-supplement-9.pdf]
